# Supplementary material
Source: PubMed Central journal article supplement (PMC8620553)
Supplement: oc1c00804_si_001.pdf [file oc1c00804_si_001.pdf]

# **Probing Affinity, Avidity, Anti-Cooperativity, and Competition in Antibody and Receptor Binding to the SARS-CoV-2 Spike by Single Particle Mass Analyses**

Victor Yin<sup>1,2,\*</sup>, Szu-Hsueh Lai<sup>1,2,\*</sup>, Tom G. Caniels<sup>3</sup>, Philip J.M. Brouwer<sup>3</sup>, Mitch Brinkkemper<sup>3</sup>, Yoann Aldon<sup>3</sup>, Hejun Liu<sup>4</sup>, Meng Yuan<sup>4</sup>, Ian A. Wilson<sup>4,5</sup>, Rogier W. Sanders<sup>3,6</sup>, Marit J. van Gils<sup>3</sup>, Albert J.R. Heck<sup>1,2,#</sup>

<sup>1</sup>Biomolecular Mass Spectrometry and Proteomics, Bijvoet Center for Biomolecular Research and Utrecht Institute for Pharmaceutical Sciences, Utrecht University, Padualaan 8, 3584 CH, Utrecht, The Netherlands

<sup>2</sup>Netherlands Proteomics Center, Padualaan 8, 3584 CH, Utrecht, The Netherlands

<sup>3</sup>Department of Medical Microbiology and Infection Prevention, Amsterdam University Medical Centers, Location AMC, University of Amsterdam, Meibergdreef 9, 1105 AZ Amsterdam, The Netherlands

<sup>4</sup>Department of Integrative Structural and Computational Biology, The Scripps Research Institute, La Jolla, CA 92037, USA

<sup>5</sup>Skaggs Institute for Chemical Biology, The Scripps Research Institute, La Jolla, CA 92037, USA

<sup>6</sup>Department of Microbiology and Immunology, Weill Medical College of Cornell University, 1300 York Avenue, New York, NY 10065, USA

## **Contents:**

**Supplemental Figures S1 – S6**

**Supplemental Tables S1 – S4**

## Supplemental Figures

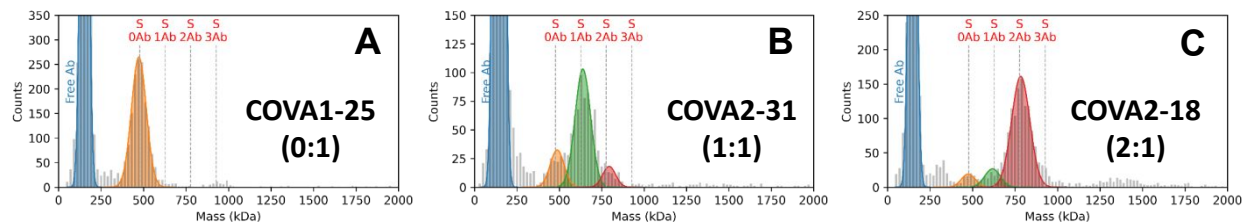

**Figure S1. Representative MP histograms of three tested Abs (IgG format) bound to the S-trimer.** (A) COVA1-25 (0:1 stoichiometry). (B) COVA2-31 (1:1 stoichiometry). (C) COVA2-18 (2:1 stoichiometry). As demonstrated here, different anti-S-trimer Abs can exhibit a variety of binding stoichiometries.

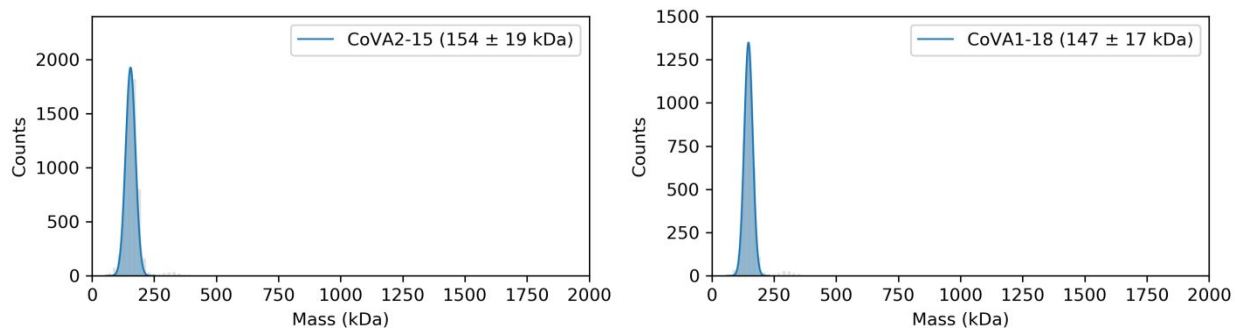

**Figure S2. MP histograms of the COVA2-15 and COVA1-18 IgGs.** A single mass distribution at ~150 kDa is observed for both Abs in line with the predicted masses.

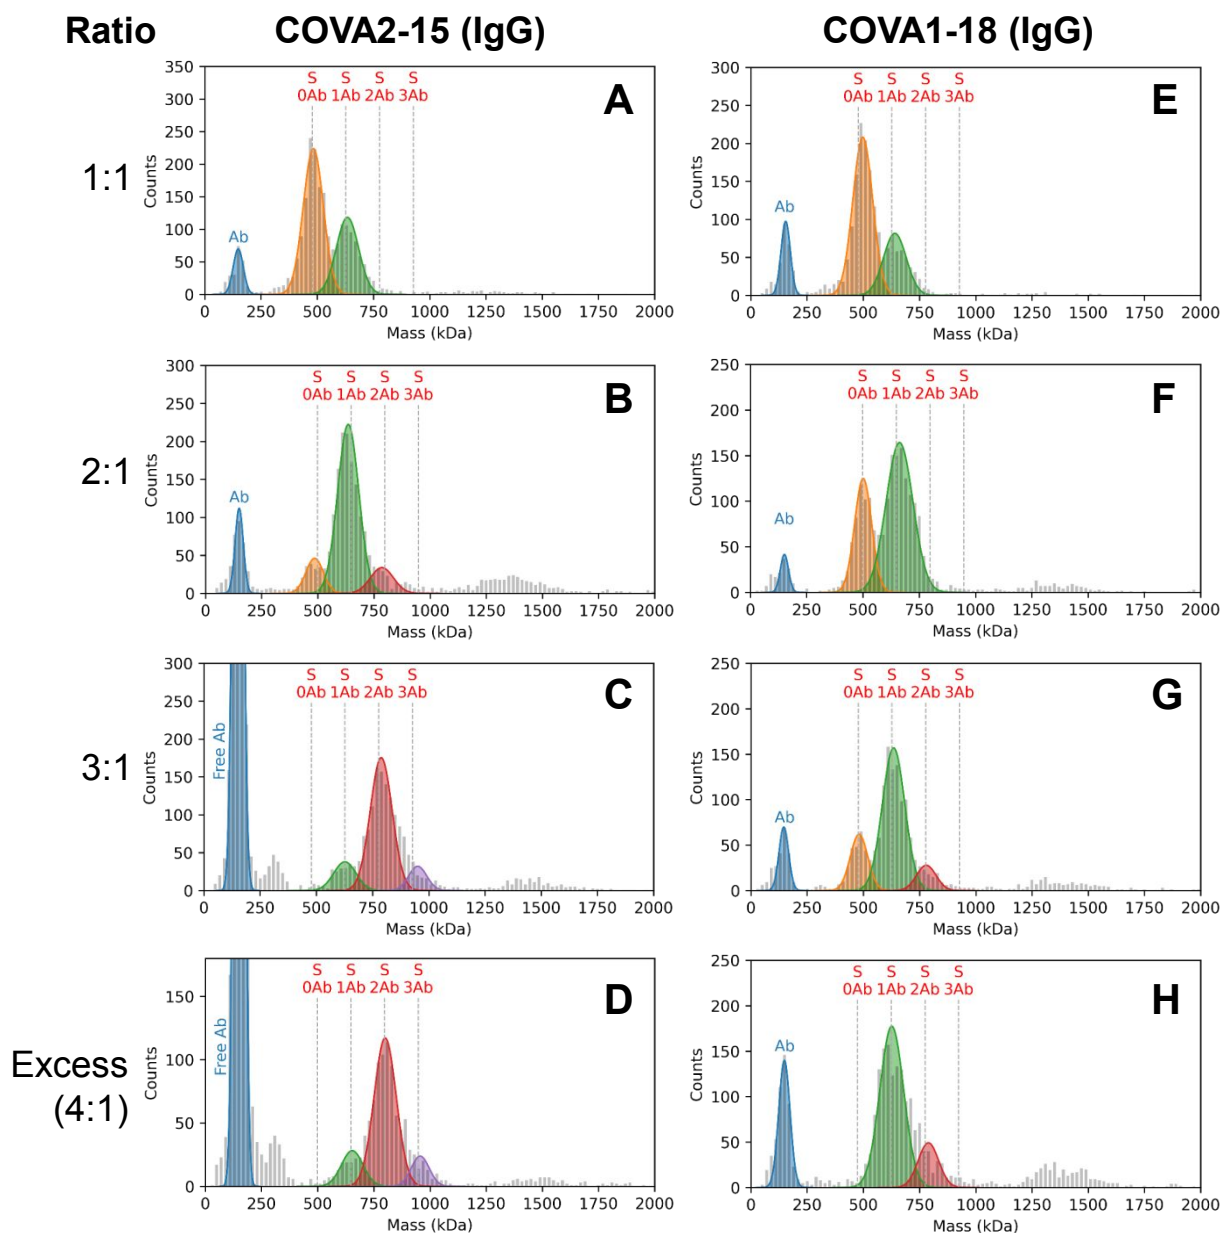

**Figure S3. Stoichiometry of COVA2-15 and COVA1-18 binding to the S-trimer assessed by MP.** MP histograms of COVA2-15 and COVA1-18 IgG binding to the SARS-CoV-2 S-trimer at different mixing ratios. (A-D): COVA2-15 Ab. (E-H): COVA1-18 Ab. The vertical dashed lines indicate the theoretical peak positions of each Ab-bound species. The data clearly reveal that full stoichiometric binding is not achieved for either Ab, but also that COVA2-15 preferably binds two Abs, whereas even at excess preferably just one COVA1-18 binds to the S-trimer. As expected, lower mixing ratios result in lower observed binding stoichiometries. The low-abundance signals observed between 1200 and 1600 kDa originate from Ab-binding induced S-trimer dimers. The measured masses and abundances related to these data are provided in **Supplemental Table S4**.

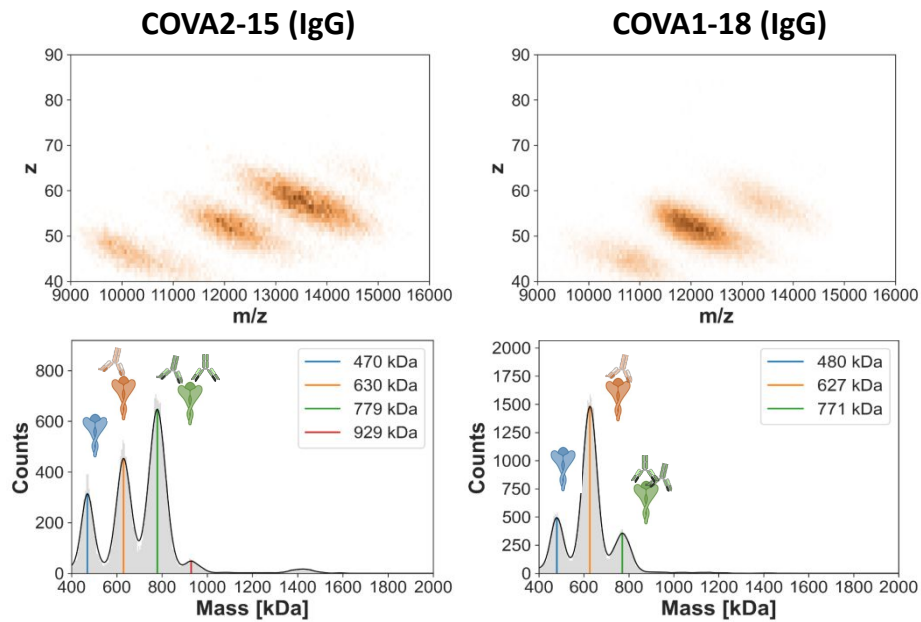

**Figure S4. Stoichiometry of Ab binding to the S-trimer assessed by Orbitrap-based charge detection native mass spectrometry.** Two-dimensional mass spectra of COVA2-15 and COVA1-18 Ab binding to the SARS-CoV-2 S-trimer at a mixing ratio of 4:1. Left: COVA2-15 Ab. Right: COVA1-18 Ab. The data are in line with the MP data presented in **Figure 2**, and also reveal that full stoichiometric binding is not achieved for either Ab, but also that COVA2-15 binds more readily two Abs, whereas even at excess preferably just one COVA1-18 binds to the S-trimer. The measured masses and abundances related to these data and provided in **Supplemental Table S4**.

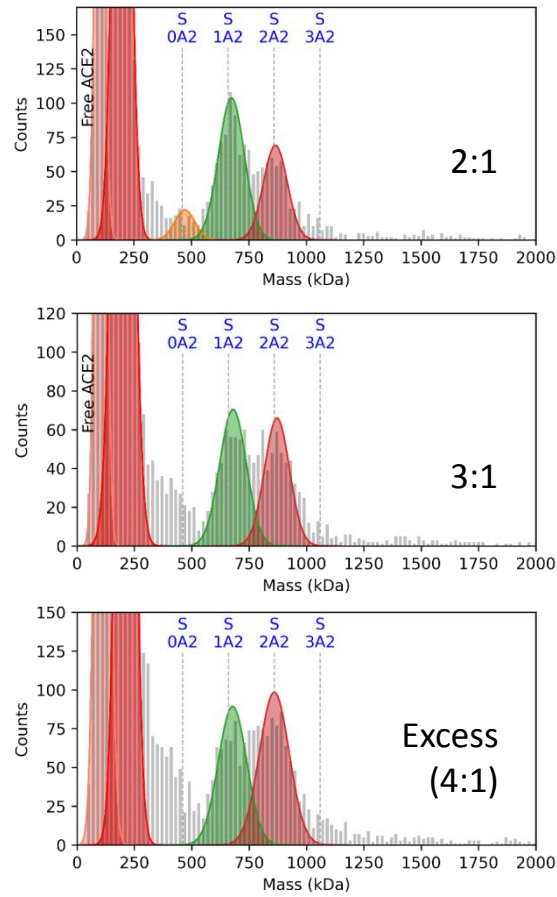

**Figure S5. MP histograms of ACE2 binding to the S-trimer at increasing ratios.** Even at an excess of 4:1, a substantial number of S-trimers still only bind one ACE2, and essentially no binding of 3 ACE2 is observed. Interference from a tetrameric ACE2 sub-population occlude accurate quantitation of the free S-trimer.

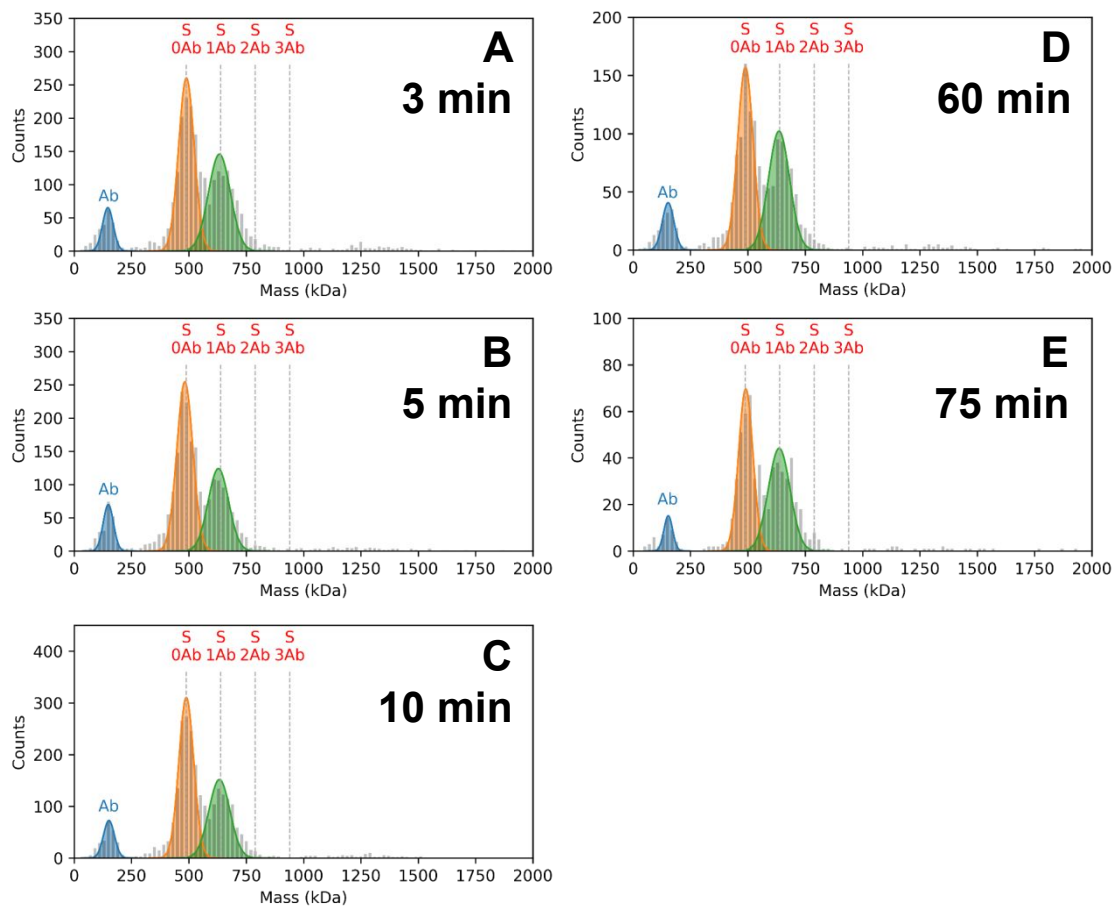

**Figure S6. MP histograms of COVA2-15 binding to the S-trimer (1:1 ratio) at different incubation times.** No major differences in binding populations are observed up to 75 minutes, confirming that samples are adequately equilibrated at the time of measurement. An incubation time of 5 minutes was used for all other measurements.

**Supplemental Table S1. Tabulation of masses of SARS-CoV-2 S-trimer.**

| <b>Method</b> | <b>Species</b> | <b>Mass (kDa)</b> | <b>FWHM (kDa)</b> | <b>Normalized Abundance (%)</b> |
|---------------|----------------|-------------------|-------------------|---------------------------------|
| MP            | S (monomer)    | 139               | 73                | 8                               |
| MP            | S (trimer)     | 475               | 106               | 92                              |
| CD-MS         | S (monomer)    | 159               | 29                | 5                               |
| CD-MS         | S (trimer)     | 477               | 61                | 95                              |

**Supplemental Table S2. Tabulation of fractional occupancies of each Ab bound to the S-trimer.** Tabulated values are derived from the normalized summation of two 120 second MP acquisitions.

| <b>IgG</b> | <b>Fractional Occupancies</b> |              |              |              |
|------------|-------------------------------|--------------|--------------|--------------|
|            | <b>+0 Ab</b>                  | <b>+1 Ab</b> | <b>+2 Ab</b> | <b>+3 Ab</b> |
| COVA1-25   | 1.000                         | 0.000        | 0.000        | 0.000        |
| COVA1-21   | 0.579                         | 0.384        | 0.037        | 0.000        |
| COVA2-31   | 0.334                         | 0.572        | 0.095        | 0.000        |
| COVA1-18   | 0.249                         | 0.671        | 0.080        | 0.000        |
| COVA1-26   | 0.127                         | 0.710        | 0.164        | 0.000        |
| COVA2-02   | 0.211                         | 0.497        | 0.292        | 0.000        |
| COVA1-16   | 0.112                         | 0.601        | 0.287        | 0.000        |
| COVA1-22   | 0.090                         | 0.522        | 0.388        | 0.000        |
| COVA2-07   | 0.089                         | 0.503        | 0.408        | 0.000        |
| COVA1-27   | 0.182                         | 0.266        | 0.491        | 0.062        |
| COVA2-18   | 0.115                         | 0.127        | 0.711        | 0.047        |
| COVA2-15   | 0.023                         | 0.228        | 0.628        | 0.121        |

**Supplemental Table S3. Tabulation of Ab epitopes, neutralization, and  $K_{D,app}$** 

| <b>Antibody</b> | <b>Epitope*</b> | <b>Neutralizes?*</b> | <b><math>K_{D,app}</math><br/>(nM)*</b> |
|-----------------|-----------------|----------------------|-----------------------------------------|
| COVA1-25        | non-RBD         | Yes                  | N.D.                                    |
| COVA1-21        | non-RBD         | Yes                  | 34                                      |
| COVA2-31        | RBD             | No                   | 0.3                                     |
| COVA1-18        | RBD             | Yes                  | 0.03                                    |
| COVA1-26        | NTD             | No                   | 0.9                                     |
| COVA2-02        | RBD             | Yes                  | 0.3                                     |
| COVA1-16        | RBD (Up)        | Yes                  | 0.3                                     |
| COVA1-22        | NTD             | Yes                  | 0.4                                     |
| COVA2-07        | RBD             | Yes                  | 0.6                                     |
| COVA1-27        | non-RBD         | No                   | 0.7                                     |
| COVA2-18        | S2              | No                   | 1.6                                     |
| COVA2-15        | RBD (Up+Down)   | Yes                  | 0.6                                     |

\* Data from ref<sup>12</sup> of main text.



**Supplemental Table S4. Tabulation of masses for Ab binding experiments.**

| <b>Method</b> | <b>Sample</b>                 | <b>Species</b> | <b>Mass (kDa)</b> | <b>FWHM (kDa)</b> | <b>Normalized Abundance (%)</b> |
|---------------|-------------------------------|----------------|-------------------|-------------------|---------------------------------|
| MP            | COVA1-18 + S-trimer (1:1 mix) | S              | 498               | 104               | 69                              |
|               |                               | S + 1Ab        | 640               | 120               | 31                              |
|               | COVA1-18 + S-trimer (2:1 mix) | S              | 501               | 89                | 33                              |
|               |                               | S + 1Ab        | 662               | 141               | 67                              |
|               | COVA1-18 + S-trimer (3:1 mix) | S              | 481               | 92                | 21                              |
|               |                               | S + 1Ab        | 634               | 118               | 69                              |
|               |                               | S + 2Ab        | 780               | 101               | 11                              |
|               | COVA1-18 + S-trimer (4:1 mix) | S + 1Ab        | 626               | 125               | 81                              |
|               |                               | S + 2Ab        | 789               | 106               | 19                              |
|               | COVA2-15 + S-trimer (1:1 mix) | S              | 482               | 106               | 63                              |
|               |                               | S + 1Ab        | 634               | 115               | 37                              |
|               | COVA2-15 + S-trimer (2:1 mix) | S              | 486               | 92                | 13                              |
|               |                               | S + 1Ab        | 635               | 111               | 75                              |
|               |                               | S + 2Ab        | 785               | 120               | 12                              |
|               | COVA2-15 + S-trimer (3:1 mix) | S + 1Ab        | 627               | 118               | 16                              |
|               |                               | S + 2Ab        | 788               | 115               | 73                              |
|               |                               | S + 3Ab        | 951               | 94                | 11                              |
|               | COVA2-15 + S-trimer (4:1 mix) | S + 1Ab        | 654               | 113               | 17                              |
| S + 2Ab       |                               | 800            | 115               | 71                |                                 |
| S + 3Ab       |                               | 956            | 94                | 12                |                                 |
| CD-MS         | COVA1-18 + S-trimer (4:1 mix) | S              | 480               | 70                | 20                              |
|               |                               | S + 1Ab        | 627               | 76                | 63                              |
|               |                               | S + 2Ab        | 771               | 86                | 17                              |
|               | COVA2-15 + S-trimer (4:1 mix) | S              | 470               | 65                | 17                              |
|               |                               | S + 1Ab        | 630               | 77                | 30                              |
|               |                               | S + 2Ab        | 779               | 87                | 48                              |
|               |                               | S + 3Ab        | 929               | 91                | 5                               |
